# Supplementary material for: Enhanced recombination empowers the detection and mapping of Quantitative Trait Loci
Source: Commun Biol. 2024 Jul 8;7:829. doi: 10.1038/s42003-024-06530-w (PMC11231358; doi:10.1038/s42003-024-06530-w)
Supplement: Supplementary file 4 — Supplementary Data 1 [file 42003_2024_6530_MOESM4_ESM.xlsx]

## Sheet: Sheet1
Primers used for low resolution mapping Col-0 x Ler
(Lisa Smith, Baulcombe Group)
Chromosome	Marker	Primer	Sequence
1	LID2	LID2F	ACCCGCGTTTGAAACACCTACA
		LID2R	CTCATTCTCCATTACTCCATTCTGCC
	SNP20	SNP20F	ATGCAAAGCAAGACACATCTTCAGAC
		SNP20R	AGTGCAAGATCCCGATGGTATTCT
2	LID40	LID 40F	GAAACAAGAACAAAAGCCACTGGGT
		LID 40R	ATGTGGAAATCTCAAAGCAGCGT
	LID7	LID 7F	GTCTGGATCTTGTATCGCAAACCAA
		LID 7R	ATAGCTGAGTGCTTCAGAGCTGATGA
3	LID32	LID 32F	CTTTACCTGGATAATCCAATGAGCG
		LID 32R	GCGGATGAGTATCATCCAGTACACTT
	LID56	LID 56F	GCGTAGGAAAGCGATGATGCATAATAG
		LID 56R	GGACAAGTCCTTACGTTTTCTCTTAAGC
4	LID38	LID 38F	TCCCATTTTGGTCATTGACTTGT
		LID 38R	AAACGCAATGTTCAATCCTCTCTTC
	LID26	LID 26F	TATCCTGCACGCTACAAGGAAAAAA
		LID 26R	ACTTGTTCAAGCTTTTCCTCCATTG
5	SNP9	SNP9F	TTGCGATGAATTTGTTAAAAGTTTCAC
		SNP9R	CTTGTGGGAACACAACCAAACTAGTAC
	LID45	LID 45F	ACTGTTGAAGGATGACTCGTCTGTGA
		LID 45R	TCAAGCTTCAGATTTGGGACACTG
